# Supplementary material
Source: HighWire-hosted journal article supplement (https://bmjopen.bmj.com/content/10/7/e038843)

PROGETTO  
AMPI  
SPETTR

## ITA-KAAR

ITA-KAAR: Read the statements in the left column and draw an **X** in the right column according to your level of agreement with the statement expressed

Totally disagree

Totally agree

1. Antibiotic resistance is a major public health problem in our setting

2. In primary care it is useful to wait for a microbiology result before treating an infectious diseases.

3. Prescribing an antibiotic to a patient does not influence the development of resistance.

4. New antibiotics will be developed to solve the problem of resistance.

5. The use of antibiotics in animals is a major cause of the occurrence of new resistance.

6. When in doubt, it is better to ensure that a patient is cured of an infection by using a broad-spectrum antibiotic.

7. I often prescribe antibiotics because it is impossible to track the patient accurately.

8. When in doubt as to whether a patient has a bacterial disease, it is best to prescribe an antibiotic.

9. I often prescribe antibiotics because patients ask me for them

10. If a patient believes that he needs an antibiotic and the doctor does not prescribe it, he will get it at the pharmacy without a prescription.

11. Amoxicillin is useful for resolving most respiratory infections in primary care.

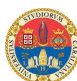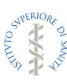

PROGETTO  
AMPI  
SPETTR

How do you evaluate the usefulness of the following sources of information in the treatment of respiratory infection? Draw an **X** in the right column depending on your level of agreement with the statement

Not useful at all

Very useful

1. Guidelines

---

2. Informative materials provided by pharmaceutical companies

---

3. Courses provided by pharmaceutical companies

---

4. Medical sales representatives

---

5. Previous clinical experience

---

6. Online resources (Guidelines, Medical Apps, etc.)

---

7. Other specialists (microbiologists, pneumologists etc.);

---

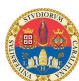

# PROGETTO AMPI SPETTR

Third section: we added this section to understand if, and how, some organizational aspects can influence the prescription of antibiotics. Please answer to the following short contextual questions

- ☐ What is your year of birth?

- ☐ To which gender identity do you most identify?

- ☐ What is your graduation year?

- ☐ Do you have the diploma of the Specific Training Course in General Practice?

|     |    |
|-----|----|
| Yes | No |
|-----|----|

- ☐ Do you have a medical postgraduate specialization?

|     |    |
|-----|----|
| Yes | No |
|-----|----|

- ☐ How many minutes on average do you have for each patient?

- ☐ Do you have a study collaborator?

|     |    |
|-----|----|
| Yes | No |
|-----|----|

- ☐ What is the indicative number of your daily contacts (outpatient visits + home visits + telephone advice) on a typical day in the flu season (from mid-October to the end of April)?

- ☐ How do you organize access to your clinic?

|                       |                    |
|-----------------------|--------------------|
| mainly by appointment | mainly free access |
|-----------------------|--------------------|

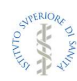

Supplement: inline-supplementary-material-1 [file inline-supplementary-material-1.pdf]
