# Supplementary material
Source: HighWire-hosted journal article supplement (https://bmjopen.bmj.com/content/10/7/e038843)
Supplement: inline-supplementary-material-2 [file inline-supplementary-material-2.pdf]

*Weights system, set up by the Department of Programming of the Italian Ministry of Health*

| <i>Age<br/>group</i> | 0 | 1-4   | 5-14  | 15-44<br>Men | 15-44<br>Women | 45-64 | 65-74 | > of 74 |
|----------------------|---|-------|-------|--------------|----------------|-------|-------|---------|
| <i>Weight</i>        | 1 | 0,969 | 0,695 | 0,693        | 0,771          | 2,104 | 4,176 | 4,29    |
